# Supplementary material for: Efficacy and safety of bevacizumab plus chemotherapy compared to chemotherapy alone in previously untreated advanced or metastatic colorectal cancer: a systematic review and meta-analysis
Source: Springer Nature journal article supplement (doi:10.1186/s12885-016-2734-y), 2016-08-24
Supplement: MOESM3 [file 10614970]

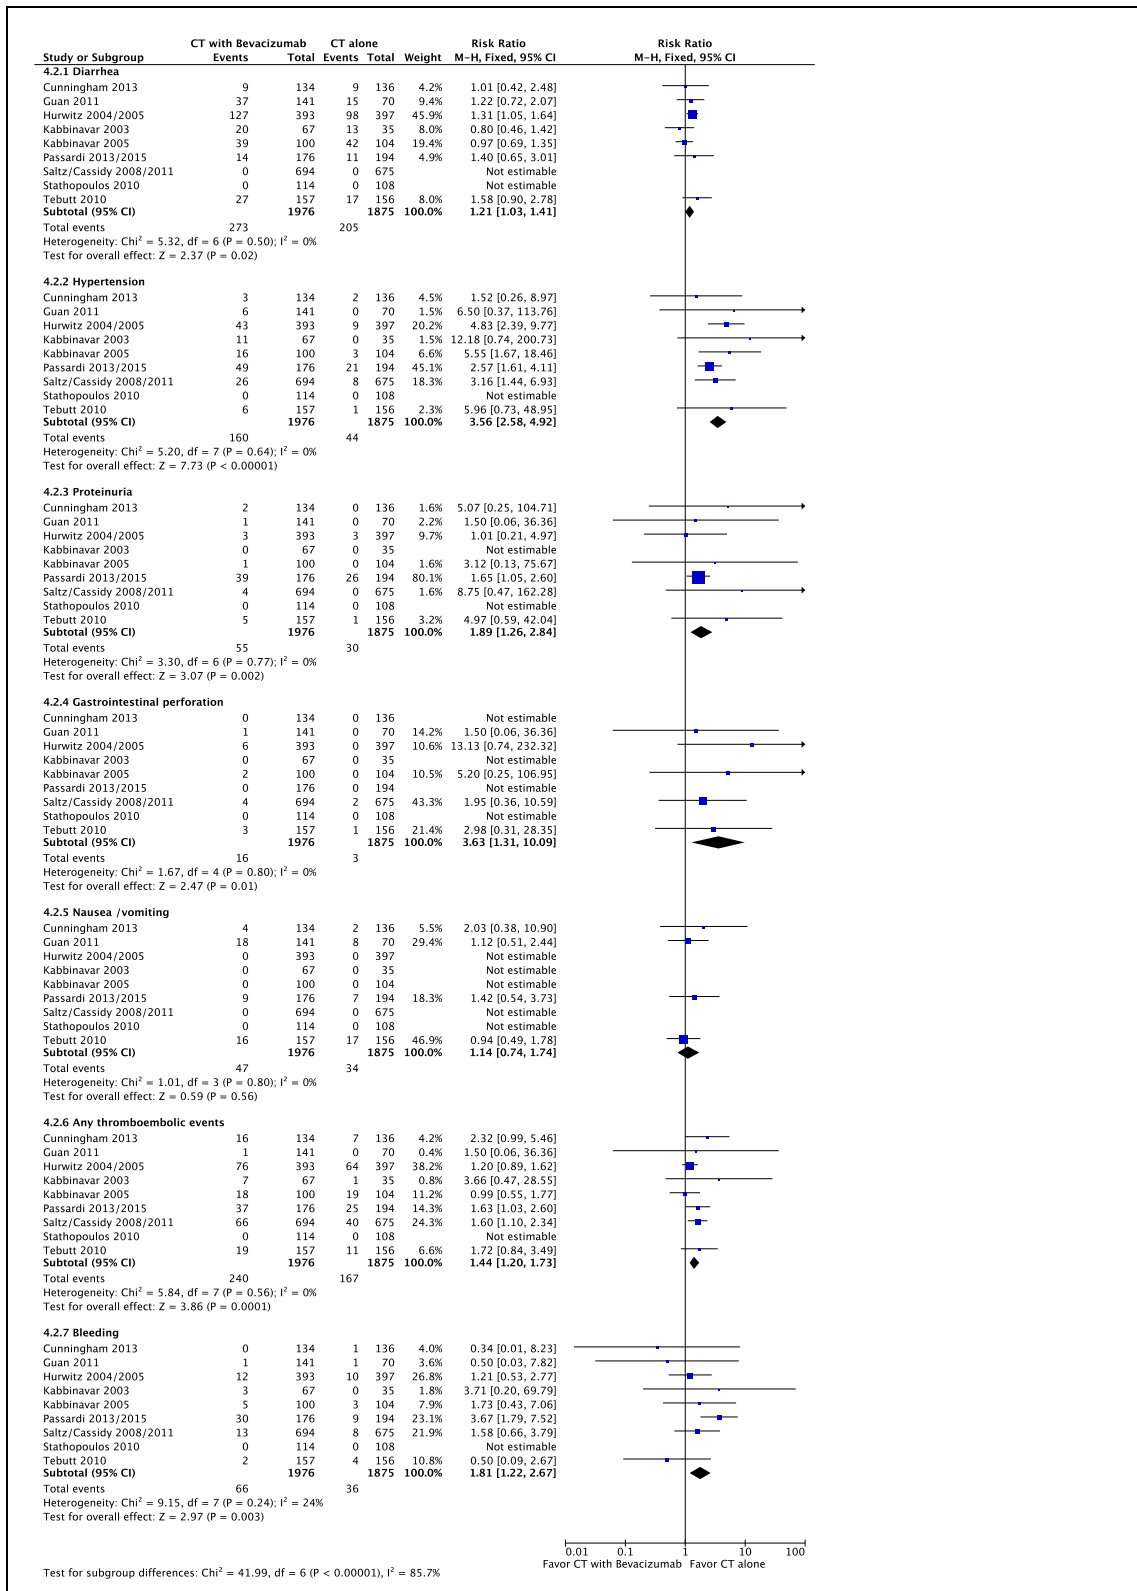

**Figure 7. Comparative effect in non-hematologic toxicities of chemotherapy with bevacizumab versus chemotherapy alone**

Abbreviations: CT, chemotherapy; CI, confidence interval
